# Supplementary material for: Strain-promoted azide–alkyne cycloaddition for protein–protein coupling in the formation of a bis-hemoglobin as a copper-free oxygen carrier
Source: Royal Society of Chemistry journal article supplement (doi:10.1039/c6ob01817c), 2016-01-01
Supplement: c6ob01817c1.pdf [file c6ob01817c1.pdf]

## Supplemental Information

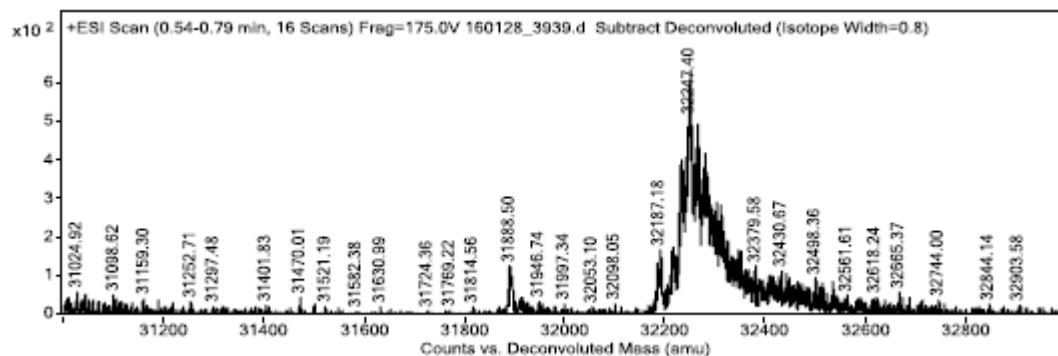

**Figure SI 1.** Mass spectrum of Hb-cyclooctyne ( $\beta$ -subunits cross-linked). ( $(\beta$ -subunit (15867.22-1.01)  $\times$  2) +  $C_{26}O_7N_2H_{30}$  (482.58)) = 32215.00 g/mol. We cannot attribute the mass spectrum heterogeneity to an impurity of the cyclooctyne handle, since Hb-cyclooctyne reacts to completion in the presence of bis-azide (see Figure SI 3). The complex spectrum may result from transformations occurring during mass analysis.

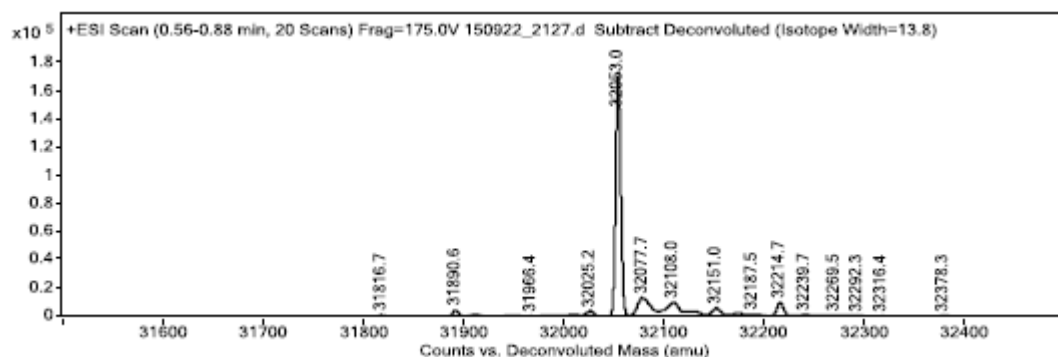

**Figure SI 2.** Mass spectrum of Hb-azide ( $\beta$ -subunits cross-linked). ( $\beta$ -subunits ((15867.22-1.01)  $\times$  2) +  $C_{17}O_3N_4H_{12}$  (320.33)) = 32052.75 g/mol.

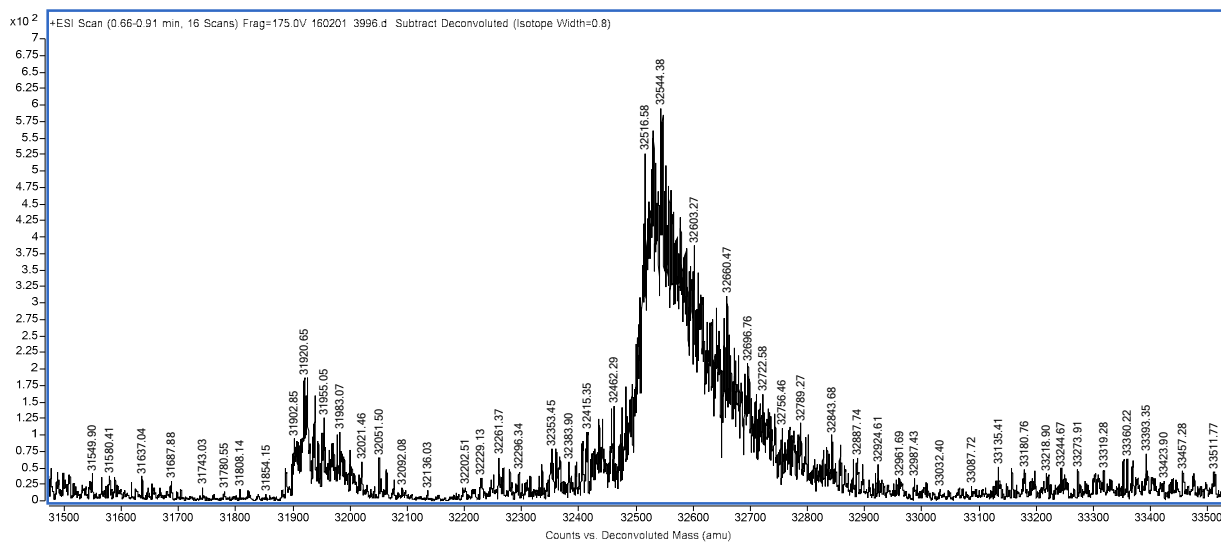

**Figure SI 3.** Mass spectrum of Hb-cyclooctyne ( $\beta$ -subunits cross-linked) modified with bis-azide (4,4'-diazidediphenylsulfone) only. (( $\beta$ -subunit (15867.22-1.01)  $\times$  2) +  $C_{26}O_7N_2H_{30}$  (482.58) +  $C_{12}SO_2N_6H_8$  (300.30)) = 32515.00 g/mol.

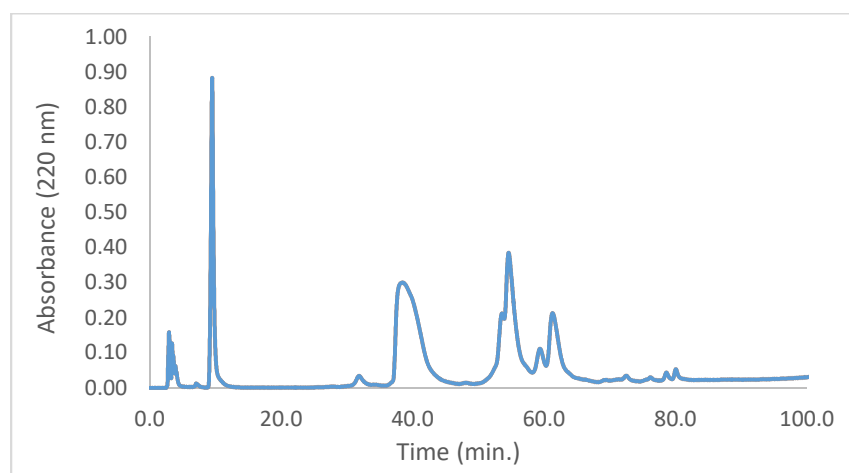

**Figure SI 4.** Reverse-phase HPLC of Hb-alkyne under dissociating conditions. Peaks are as follows: heme (10 min.);  $\alpha$ -subunits (40 min.);  $\beta$  cross-linked subunits (alkyne modified, 54 min.).

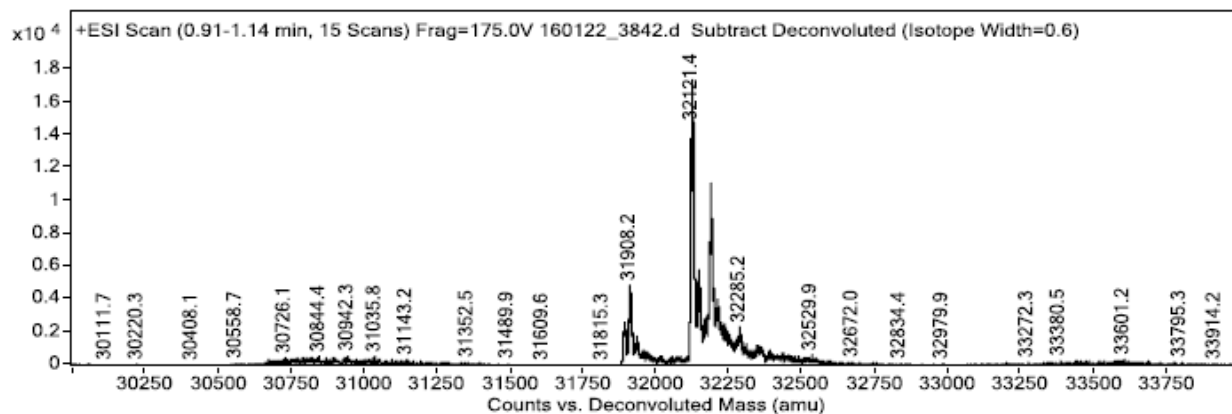

**Figure SI 5.** Mass spectrum of Hb-alkyne ( $\beta$ -subunits cross-linked).  $((\beta\text{-subunits (15867.22-1.01)} \times 2) + \text{C}_{20}\text{O}_7\text{NH}_{23} (389.44)) = 32121.86 \text{ g/mol}$ .

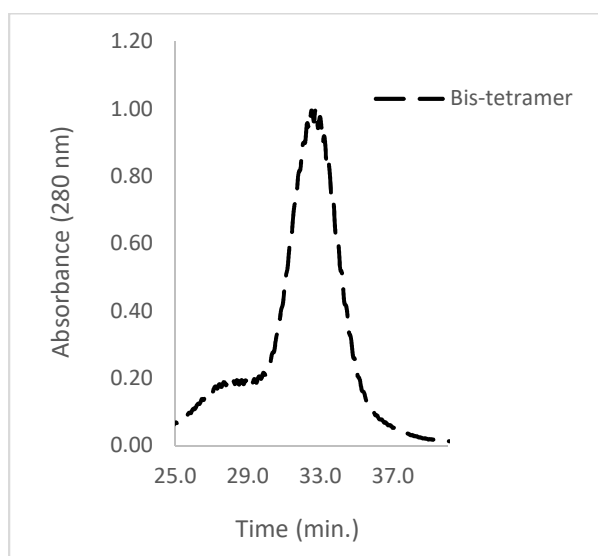

**Figure SI 6.** Size-exclusion HPLC trace of the purified bis-tetramer.

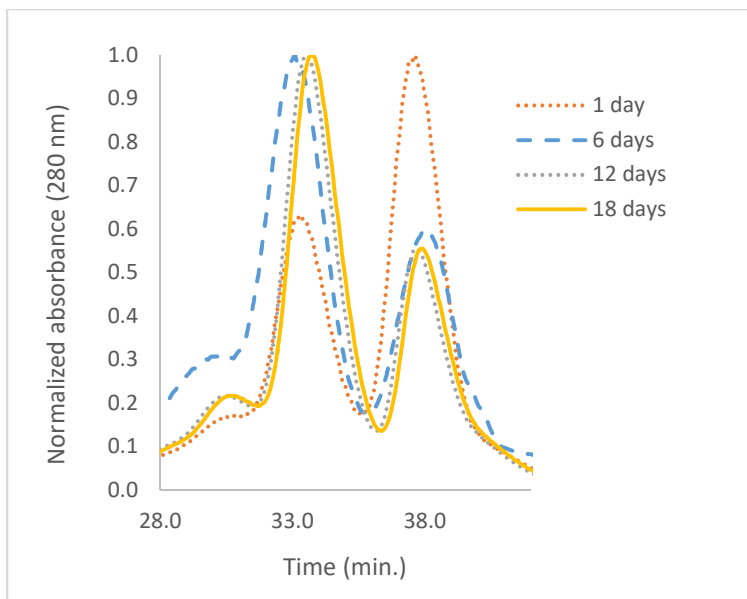

**Figure SI 7.** Size-exclusion HPLC trace of the products of the reaction of Hb-azide with Hb-cyclooctyne after 18 days.

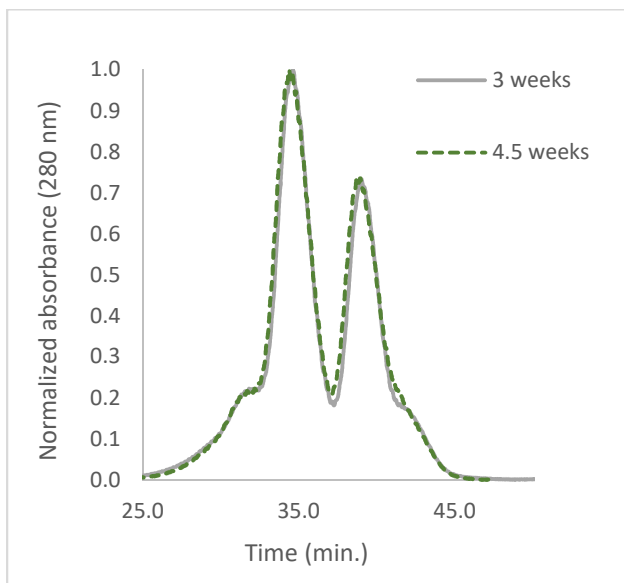

**Figure SI 8.** Size-exclusion HPLC trace of the products of the reaction of Hb-cyclooctyne with bis-azide (PEG spacer).
